# Supplementary material for: The risk of Long Covid symptoms: a systematic review and meta-analysis of controlled studies
Source: Springer Nature journal article supplement (doi:10.1038/s41467-025-59012-w), 2025-05-07
Supplement: MOESM1 [file 41467_2025_59012_MOESM1_ESM.pdf]

**Supplementary Table 1.** PRISMA Checklist

| Section and Topic             | Item # | Checklist item                                                                                                                                                                                                                                                                                       | Location where item is reported |
|-------------------------------|--------|------------------------------------------------------------------------------------------------------------------------------------------------------------------------------------------------------------------------------------------------------------------------------------------------------|---------------------------------|
| <b>TITLE</b>                  |        |                                                                                                                                                                                                                                                                                                      |                                 |
| Title                         | 1      | Identify the report as a systematic review.                                                                                                                                                                                                                                                          | Page 1                          |
| <b>ABSTRACT</b>               |        |                                                                                                                                                                                                                                                                                                      |                                 |
| Abstract                      | 2      | See the PRISMA 2020 for Abstracts checklist.                                                                                                                                                                                                                                                         | Page 4                          |
| <b>INTRODUCTION</b>           |        |                                                                                                                                                                                                                                                                                                      |                                 |
| Rationale                     | 3      | Describe the rationale for the review in the context of existing knowledge.                                                                                                                                                                                                                          | Pages 5-6                       |
| Objectives                    | 4      | Provide an explicit statement of the objective(s) or question(s) the review addresses.                                                                                                                                                                                                               | Page 6                          |
| <b>METHODS</b>                |        |                                                                                                                                                                                                                                                                                                      |                                 |
| Eligibility criteria          | 5      | Specify the inclusion and exclusion criteria for the review and how studies were grouped for the syntheses.                                                                                                                                                                                          | Page 15-16                      |
| Information sources           | 6      | Specify all databases, registers, websites, organisations, reference lists and other sources searched or consulted to identify studies. Specify the date when each source was last searched or consulted.                                                                                            | Page 17                         |
| Search strategy               | 7      | Present the full search strategies for all databases, registers and websites, including any filters and limits used.                                                                                                                                                                                 | Supplementary file, Table S2    |
| Selection process             | 8      | Specify the methods used to decide whether a study met the inclusion criteria of the review, including how many reviewers screened each record and each report retrieved, whether they worked independently, and if applicable, details of automation tools used in the process.                     | Page 17-18                      |
| Data collection process       | 9      | Specify the methods used to collect data from reports, including how many reviewers collected data from each report, whether they worked independently, any processes for obtaining or confirming data from study investigators, and if applicable, details of automation tools used in the process. | Page 18                         |
| Data items                    | 10a    | List and define all outcomes for which data were sought. Specify whether all results that were compatible with each outcome domain in each study were sought (e.g. for all measures, time points, analyses), and if not, the methods used to decide which results to collect.                        | Page 19                         |
|                               | 10b    | List and define all other variables for which data were sought (e.g. participant and intervention characteristics, funding sources). Describe any assumptions made about any missing or unclear information.                                                                                         | Page 19                         |
| Study risk of bias assessment | 11     | Specify the methods used to assess risk of bias in the included studies, including details of the tool(s) used, how many reviewers assessed each study and whether they worked independently, and if applicable, details of automation tools used in the process.                                    | Page 18                         |
| Effect measures               | 12     | Specify for each outcome the effect measure(s) (e.g. risk ratio, mean difference) used in the synthesis or presentation of results.                                                                                                                                                                  | Page 19                         |
| Synthesis methods             | 13a    | Describe the processes used to decide which studies were eligible for each synthesis (e.g. tabulating the study intervention characteristics and comparing against the planned groups for each synthesis (item #5)).                                                                                 | Page 19                         |
|                               | 13b    | Describe any methods required to prepare the data for presentation or synthesis, such as handling of missing summary                                                                                                                                                                                 | Page 19                         |

| Section and Topic             | Item # | Checklist item                                                                                                                                                                                                                                                                       | Location where item is reported        |
|-------------------------------|--------|--------------------------------------------------------------------------------------------------------------------------------------------------------------------------------------------------------------------------------------------------------------------------------------|----------------------------------------|
|                               |        | statistics, or data conversions.                                                                                                                                                                                                                                                     |                                        |
|                               | 13c    | Describe any methods used to tabulate or visually display results of individual studies and syntheses.                                                                                                                                                                               | Page 19                                |
|                               | 13d    | Describe any methods used to synthesize results and provide a rationale for the choice(s). If meta-analysis was performed, describe the model(s), method(s) to identify the presence and extent of statistical heterogeneity, and software package(s) used.                          | Page 19                                |
|                               | 13e    | Describe any methods used to explore possible causes of heterogeneity among study results (e.g. subgroup analysis, meta-regression).                                                                                                                                                 | Page 19                                |
|                               | 13f    | Describe any sensitivity analyses conducted to assess robustness of the synthesized results.                                                                                                                                                                                         | N/A                                    |
| Reporting bias assessment     | 14     | Describe any methods used to assess risk of bias due to missing results in a synthesis (arising from reporting biases).                                                                                                                                                              | N/A                                    |
| Certainty assessment          | 15     | Describe any methods used to assess certainty (or confidence) in the body of evidence for an outcome.                                                                                                                                                                                | N/A                                    |
| <b>RESULTS</b>                |        |                                                                                                                                                                                                                                                                                      |                                        |
| Study selection               | 16a    | Describe the results of the search and selection process, from the number of records identified in the search to the number of studies included in the review, ideally using a flow diagram.                                                                                         | Figure 1.                              |
|                               | 16b    | Cite studies that might appear to meet the inclusion criteria, but which were excluded, and explain why they were excluded.                                                                                                                                                          | N/A                                    |
| Study characteristics         | 17     | Cite each included study and present its characteristics.                                                                                                                                                                                                                            | Supplementary file, Table S3           |
| Risk of bias in studies       | 18     | Present assessments of risk of bias for each included study.                                                                                                                                                                                                                         | Supplementary file, Table S4           |
| Results of individual studies | 19     | For all outcomes, present, for each study: (a) summary statistics for each group (where appropriate) and (b) an effect estimate and its precision (e.g. confidence/credible interval), ideally using structured tables or plots.                                                     | Figure 2<br>Supplementary figures 1-3. |
| Results of syntheses          | 20a    | For each synthesis, briefly summarise the characteristics and risk of bias among contributing studies.                                                                                                                                                                               | Supplementary file, Table S4.          |
|                               | 20b    | Present results of all statistical syntheses conducted. If meta-analysis was done, present for each the summary estimate and its precision (e.g. confidence/credible interval) and measures of statistical heterogeneity. If comparing groups, describe the direction of the effect. | Figure 2<br>Supplementary figures 1-3. |
|                               | 20c    | Present results of all investigations of possible causes of heterogeneity among study results.                                                                                                                                                                                       | Figure 2<br>Supplementary figures 1-3. |
|                               | 20d    | Present results of all sensitivity analyses conducted to assess the robustness of the synthesized results.                                                                                                                                                                           | N/A                                    |
| Reporting biases              | 21     | Present assessments of risk of bias due to missing results (arising from reporting biases) for each synthesis assessed.                                                                                                                                                              | N/A                                    |
| Certainty of                  | 22     | Present assessments of certainty (or confidence) in the body of evidence for each outcome assessed.                                                                                                                                                                                  | N/A                                    |

| Section and Topic                              | Item # | Checklist item                                                                                                                                                                                                                             | Location where item is reported |
|------------------------------------------------|--------|--------------------------------------------------------------------------------------------------------------------------------------------------------------------------------------------------------------------------------------------|---------------------------------|
| evidence                                       |        |                                                                                                                                                                                                                                            |                                 |
| <b>DISCUSSION</b>                              |        |                                                                                                                                                                                                                                            |                                 |
| Discussion                                     | 23a    | Provide a general interpretation of the results in the context of other evidence.                                                                                                                                                          | Pages 10 - 15                   |
|                                                | 23b    | Discuss any limitations of the evidence included in the review.                                                                                                                                                                            | Pages 10 – 15                   |
|                                                | 23c    | Discuss any limitations of the review processes used.                                                                                                                                                                                      | Pages 10 - 15                   |
|                                                | 23d    | Discuss implications of the results for practice, policy, and future research.                                                                                                                                                             | Pages 10 - 15                   |
| <b>OTHER INFORMATION</b>                       |        |                                                                                                                                                                                                                                            |                                 |
| Registration and protocol                      | 24a    | Provide registration information for the review, including register name and registration number, or state that the review was not registered.                                                                                             | Page 15                         |
|                                                | 24b    | Indicate where the review protocol can be accessed, or state that a protocol was not prepared.                                                                                                                                             | Page 15                         |
|                                                | 24c    | Describe and explain any amendments to information provided at registration or in the protocol.                                                                                                                                            | N/A                             |
| Support                                        | 25     | Describe sources of financial or non-financial support for the review, and the role of the funders or sponsors in the review.                                                                                                              | Page 25                         |
| Competing interests                            | 26     | Declare any competing interests of review authors.                                                                                                                                                                                         | Page 25-26                      |
| Availability of data, code and other materials | 27     | Report which of the following are publicly available and where they can be found: template data collection forms; data extracted from included studies; data used for all analyses; analytic code; any other materials used in the review. | Page 19                         |

From: Page MJ, McKenzie JE, Bossuyt PM, Boutron I, Hoffmann TC, Mulrow CD, et al. The PRISMA 2020 statement: an updated guideline for reporting systematic reviews. BMJ 2021;372:n71. doi: 10.1136/bmj.n71

For more information, visit: <http://www.prisma-statement.org/>

**Supplementary Table 2.** Search Term Table

| <b>String</b>                                             | <b>Search Terms</b>                                                                                                                                                                                                                                                                                                  |
|-----------------------------------------------------------|----------------------------------------------------------------------------------------------------------------------------------------------------------------------------------------------------------------------------------------------------------------------------------------------------------------------|
| COVID terms                                               | covid* or ncov* or novel coronavirus or novel betacoronavirus or sars-ncov-2 or sars-cov-2                                                                                                                                                                                                                           |
| Any of these within three words of any of the COVID terms | Long, chronic, long term, long-term, longterm, sequela*, post acute, post-acute, postacute, long haul*, long-haul*, longhaul*, survivor*, on going, on-going, ongoing                                                                                                                                                |
| Any of these within five words of any of the COVID terms  | persist*, recover*, discharg*, follow*, prolong*                                                                                                                                                                                                                                                                     |
| Any of these combinations                                 | post-covid syndrome, postcovid syndrome, post covid syndrome<br><br>symptomatic within three words of any of the COVID terms, but also with chronic, and any of long term, long-term, longterm<br><br>Any of chronic*, long term, long-term, longterm within three words of any of post covid, post-covid, postcovid |

**Supplementary Table 3.** Study and patient characteristics.

| Author                                      | Total # of participants (Control) | Total # of participants (COVID) | Sex (% males) Control | Sex (% males) COVID | Age (years) Control | Age (years) COVID | Hospital Status  | Time to follow up (mean/median days) | Continent     |
|---------------------------------------------|-----------------------------------|---------------------------------|-----------------------|---------------------|---------------------|-------------------|------------------|--------------------------------------|---------------|
| Adler et al., 2022 <sup>1</sup>             | 1936                              | 819                             | 43                    | 40                  | 48                  | 47                | Mixed            | 155                                  | Asia          |
| Ahn et al., 2023 <sup>2</sup>               | 105                               | 106                             | 61                    | 63                  | 2                   | 3                 | Non-hospitalised | 182                                  | Asia          |
| Albtoosh et al., 2022 <sup>3</sup>          | 347                               | 125                             | 64                    | 50                  | 41                  | 39                | Mixed            | 360                                  | Africa        |
| Ali et al., 2022 <sup>4</sup>               | 439                               | 439                             | 48                    | 51                  | 38                  | 38                | Mixed            | 180                                  | Asia          |
| Askarian et al., 2024 <sup>5</sup>          | 449                               | 1561                            | 30                    | 37                  | 42                  | 41                | Mixed            | 28                                   | Asia          |
| Barboza-Solis et al., 2024 <sup>6</sup>     | 934                               | 193                             | NR                    | NR                  | >18                 | >18               | Mixed            | >273                                 | North America |
| Bergia et al., 2022 <sup>7</sup>            | 98                                | 451                             | 57                    | 55                  | <18                 | <18               | Mixed            | >84                                  | Europe        |
| Binswanger et al., 2024 <sup>8</sup>        | 692                               | 1537                            | NR                    | NR                  | >18                 | >18               | Mixed            | 28                                   | North America |
| Blomberg, et al. 2021 <sup>9</sup>          | 43                                | 293                             | 35                    | 49                  | 42                  | 47                | Mixed            | 183                                  | Europe        |
| Boscolo-Rizzo et al., 2021 <sup>10</sup>    | 100                               | 100                             | 61                    | 61                  | 49                  | 49                | Non-hospitalised | 401                                  | Europe        |
| Cai et al., 2023 <sup>11</sup>              | 979                               | 450                             | 63                    | 57                  | 40                  | 42                | Hospitalised     | 183                                  | Asia          |
| DeBruijn et al., 2024 <sup>12</sup>         | 2726                              | 10993                           | *                     | *                   | >18                 | >18               | Mixed            | >90                                  | Europe        |
| Desgranges et al., 2022 <sup>13</sup>       | 89                                | 418                             | 37                    | 38                  | 36                  | 41                | Non-hospitalised | 150                                  | Europe        |
| Fjellveit et al., 2023 <sup>14</sup>        | 189                               | 233                             | 34                    | 47                  | 41                  | 44                | Non-hospitalised | 365                                  | Europe        |
| Funk et al., 2022 <sup>15</sup>             | 380                               | 391                             | 52                    | 54                  | <18                 | <18               | Hospitalised     | 90                                   | Multiple      |
|                                             | 1321                              | 1295                            | 47                    | 52                  | <18                 | <18               | Non-hospitalised | 90                                   | Multiple      |
| Golla et al., 2023 <sup>16</sup>            | 280                               | 320                             | 61                    | 51                  | 38                  | 38                | Hospitalised     | 183                                  | Asia          |
| Hastie et al., 2023 <sup>17</sup>           | 3974                              | 6538                            | NR                    | NR                  | >16                 | >16               | Mixed            | 538                                  | Europe        |
| Hernandez-Romieu et al., 2022 <sup>18</sup> | 320902                            | 18419                           | 41                    | 46                  | >20                 | >20               | Hospitalised     | 31-150                               | North America |
|                                             | 1061692                           | 128251                          | 38                    | 37                  | >20                 | >20               | Non-hospitalised | 31-150                               | North America |
|                                             | 47439                             | 1217                            | 50                    | 49                  | <20                 | <20               | Hospitalised     | 31-150                               | North America |
|                                             | 250073                            | 24586                           | 51                    | 48                  | <20                 | <20               | Non-hospitalised | 31-150                               | North America |
| Horberg et al., 2022 <sup>19</sup>          | 70293                             | 28118                           | 43                    | 43                  | NR                  | NR                | Mixed            | >30                                  | North America |
| Hosozawa et al., 2024 <sup>20</sup>         | 1341                              | 1800                            | 53                    | 54                  | 5-17                | 5-17              | Non-hospitalised | 60                                   | Asia          |
| Huang et al., 2022 <sup>21</sup>            | 1127                              | 1127                            | 54                    | 54                  | 59                  | 59                | Hospitalised     | 685                                  | Asia          |
| Huynh et al., 2023 <sup>22</sup>            | 55                                | 150                             | NR                    | NR                  | <16                 | <16               | Hospitalised     | 28                                   | Asia          |
| Iba et al., 2024 <sup>23</sup>              | 6318                              | 8392                            | 40                    | 42.1                | 42                  | 42                | Mixed            | 168                                  | Asia          |
| Khullar et al., 2023 <sup>24</sup>          | 71222                             | 13106                           | NR                    | NR                  | >20                 | >20               | Hospitalised     | 31-180                               | North America |
| Li et al., 2023 <sup>25</sup>               | 471                               | 169                             | 53                    | 54                  | 6                   | 6                 | Mixed            | >90                                  | Asia          |

|                                             |         |        |    |    |       |       |                  |     |               |
|---------------------------------------------|---------|--------|----|----|-------|-------|------------------|-----|---------------|
| Marasco et al., 2022 <sup>26</sup>          | 258     | 530    | 63 | 59 | 52    | 51    | Hospitalised     | 28  | Europe        |
| Nehme et al., 2022 <sup>27</sup>            | 1160    | 287    | 40 | 35 | 46    | 44    | Mixed            | 367 | Europe        |
| Newlands et al., 2023 <sup>28</sup>         | 440     | 561    | 39 | 36 | 18-20 | 18-20 | Non-hospitalised | 213 | Europe        |
| Noviello et al., 2022 <sup>29</sup>         | 183     | 164    | 39 | 60 | 40    | 44    | Mixed            | 146 | Europe        |
| Nugawela et al., 2022 <sup>30</sup>         | 3893    | 3246   | 37 | 37 | 11-17 | 11-17 | Non-hospitalised | 91  | Europe        |
| Pagen et al., 2023 <sup>31</sup>            | 345     | 2322   | NR | NR | 18-81 | 18-81 | Mixed            | >90 | Europe        |
| Park, et al. 2021 <sup>32</sup>             | 292674  | 6934   | 45 | 39 | NR    | NR    | Mixed            | 183 | Asia          |
| Pihlaja et al., 2023 <sup>33</sup>          | 50      | 155    | 51 | 44 | 55    | 53    | Mixed            | 183 | Europe        |
| PintoPereira et al., 2023 <sup>34</sup>     | 7474    | 8060   | 38 | 38 | 11-17 | 11-17 | Non-hospitalised | 365 | Europe        |
| Radtke, et al. 2021 <sup>35</sup>           | 1246    | 109    | 46 | 47 | 12    | 11    | Non-hospitalised | >84 | Europe        |
| Rao et al., 2022 <sup>36</sup>              | 599393  | 59893  | 53 | 51 | 8     | 9     | Mixed            | 140 | North America |
| Rivera-Izquierdo et al., 2022 <sup>37</sup> | 453     | 453    | 47 | 57 | 60    | 61    | Hospitalised     | 365 | Europe        |
| Roge, et al. 2021 <sup>38</sup>             | 142     | 236    | 54 | 56 | 2     | 10    | Mixed            | 74  | Europe        |
| Seery et al., 2023 <sup>39</sup>            | 577     | 639    | 52 | 53 | 8     | 7     | Hospitalised     | >90 | South America |
| Shah et al., 2023 <sup>40</sup>             | 18098   | 11015  | 37 | 38 | 54    | 51    | Mixed            | >84 | Europe        |
| Sneller et al., 2022 <sup>41</sup>          | 120     | 189    | 45 | 45 | 51    | 50    | Mixed            | 149 | North America |
| Subramanian et al., 2022 <sup>42</sup>      | 1501689 | 384137 | 45 | 45 | 44    | 44    | Non-hospitalised | 106 | Europe        |
| Thors et al., 2024 <sup>43</sup>            | 602     | 643    | 52 | 55 | 10    | 10    | Non-hospitalised | 283 | Europe        |
| Tisler et al., 2022 <sup>44</sup>           | 15511   | 3949   | 46 | 46 | 65    | 65    | Hospitalised     | 295 | Europe        |
| VanderMaaden et al., 2023 <sup>45</sup>     | 2445    | 6614   | 32 | 37 | 54    | 52    | Mixed            | 91  | Europe        |
| Van Herck et al., 2024 <sup>46</sup>        | 2028    | 6381   | 51 | 41 | 58    | 51    | Mixed            | 304 | Europe        |
| Xiong et al., 2021 <sup>47</sup>            | 184     | 538    | 52 | 46 | 50    | 52    | Hospitalised     | 97  | Asia          |
| Xu et al., 2022 <sup>48</sup>               | 5606761 | 16764  | 90 | 94 | 63    | 68    | Hospitalised     | 408 | North America |
|                                             | 5606761 | 131915 | 90 | 90 | 63    | 63    | Non-hospitalised | 408 | North America |
| Zhang et al., 2024 <sup>49</sup>            | 2020829 | 262400 | NR | NR | >20   | >20   | Non-hospitalised | ≥30 | North America |
|                                             | 662295  | 44926  | NR | NR | >20   | >20   | Hospitalised     | ≥30 | North America |
|                                             | 511383  | 58196  | NR | NR | ≤19   | ≤19   | Non-hospitalised | ≥30 | North America |
|                                             | 91933   | 2725   | NR | NR | ≤19   | ≤19   | Hospitalised     | ≥30 | North America |
| Zhao et al., 2024 <sup>50</sup>             | 113     | 257    | 54 | 30 | 48    | 49    | Mixed            | 340 | Europe        |

\* Omicron and delta variant data was combined for the meta-analysis; age was reported as median thus it was not possible to combine ages.

**Supplementary Table 4.** Risk of Bias Summary for Included Studies (Quality Assessment)

|                       | Selection                                                                                                                                |                                                     |                                    |    | Comparability     | Outcome                                                                                                   |                                              |                                  | Study Score | Overall Study Rating |
|-----------------------|------------------------------------------------------------------------------------------------------------------------------------------|-----------------------------------------------------|------------------------------------|----|-------------------|-----------------------------------------------------------------------------------------------------------|----------------------------------------------|----------------------------------|-------------|----------------------|
|                       | Representativeness of the Exposed Cohort                                                                                                 | Selection of the Non-Exposed Cohort                 | Ascertainment of Exposure          |    |                   | Assessment of outcome                                                                                     | Follow-up long enough for outcomes to occur? | Adequacy of follow Up of cohorts |             |                      |
| Adler et al., 2022    | Somewhat representative of the average patient/community member with Long Covid (eg, age, social class, ethnicity etc.) in the community | Drawn from the same community as the exposed cohort | Secure record (eg medical records) | No | Both of the above | Self-report (i.e., no reference to original medical records or laboratory reports to confirm the outcome) | Yes (i.e., >4 weeks)                         | No statement                     | 7           | Low Risk             |
| Ahn et al., 2023      | Somewhat representative of the average patient/community member with Long Covid (eg, age, social class, ethnicity etc.) in the community | Drawn from the same community as the exposed cohort | Secure record (eg medical records) | No |                   | Record linkage (e.g., identified through ICD codes on database records)                                   | Yes (i.e., >4 weeks)                         | No statement                     | 5           | Medium Risk          |
| Albtoosh et al., 2022 | Somewhat representative of the average patient/community member with Long Covid (eg, age, social class, ethnicity etc.) in the community | Drawn from the same community as the exposed cohort | Secure record (eg medical records) | No | Both of the above | Self-report (i.e., no reference to original medical records or laboratory reports to confirm the outcome) | Yes (i.e., >4 weeks)                         | No statement                     | 7           | Low Risk             |
| Ali et al., 2022      | Somewhat representative of the average patient/community member with Long Covid (eg, age,                                                | Drawn from the same community as the exposed cohort | Secure record (eg medical records) | No |                   | Self-report (i.e., no reference to original medical records or laboratory reports                         | Yes (i.e., >4 weeks)                         | No statement                     | 4           | Medium Risk          |

|                            |                                                                                                                                          |                                                     |                                    |    |  |                         |                                                                                                           |                      |                                                                                        |                  |
|----------------------------|------------------------------------------------------------------------------------------------------------------------------------------|-----------------------------------------------------|------------------------------------|----|--|-------------------------|-----------------------------------------------------------------------------------------------------------|----------------------|----------------------------------------------------------------------------------------|------------------|
|                            | social class, ethnicity etc.) in the community                                                                                           |                                                     |                                    |    |  | to confirm the outcome) |                                                                                                           |                      |                                                                                        |                  |
| Askaria n et al., 2024     | Somewhat representative of the average patient/community member with Long Covid (eg, age, social class, ethnicity etc.) in the community | Drawn from the same community as the exposed cohort | Written self-report                | No |  | Both of the above       | Self-report (i.e., no reference to original medical records or laboratory reports to confirm the outcome) | Yes (i.e., >4 weeks) | No statement                                                                           | 6<br>Medium Risk |
| Barboza-Solis et al., 2024 | Somewhat representative of the average patient/community member with Long Covid (eg, age, social class, ethnicity etc.) in the community | Drawn from the same community as the exposed cohort | Secure record (eg medical records) | No |  | Both of the above       | Self-report (i.e., no reference to original medical records or laboratory reports to confirm the outcome) | Yes (i.e., >4 weeks) | Follow up rate < 80% and no description of those lost                                  | 7<br>Low Risk    |
| Bergia et al., 2022        | Somewhat representative of the average patient/community member with Long Covid (eg, age, social class, ethnicity etc.) in the community | Drawn from the same community as the exposed cohort | Secure record (eg medical records) | No |  |                         | Self-report (i.e., no reference to original medical records or laboratory reports to confirm the outcome) | Yes (i.e., >4 weeks) | No statement                                                                           | 5<br>Medium Risk |
| Binswanger et al., 2024    | Somewhat representative of the average patient/community member with Long Covid (eg, age, social class, ethnicity etc.) in the community | Drawn from the same community as the exposed cohort | Secure record (eg medical records) | No |  | Both of the above       | Self-report (i.e., no reference to original medical records or laboratory reports to confirm the outcome) | Yes (i.e., >4 weeks) | Subjects lost to follow up unlikely to introduce bias (i.e., follow up rate > 80%), or | 8<br>Low Risk    |



|                                      |                                                                                                                                                                  |                                                                 |                                             |    |                      |                                                                                                                             |                            |                                                                                                                                                                                           |   |          |
|--------------------------------------|------------------------------------------------------------------------------------------------------------------------------------------------------------------|-----------------------------------------------------------------|---------------------------------------------|----|----------------------|-----------------------------------------------------------------------------------------------------------------------------|----------------------------|-------------------------------------------------------------------------------------------------------------------------------------------------------------------------------------------|---|----------|
|                                      |                                                                                                                                                                  |                                                                 |                                             |    |                      |                                                                                                                             |                            | descrip<br>tion<br>provide<br>d of<br>those<br>lost                                                                                                                                       |   |          |
| Blomber<br>g, et al.,<br>2021        | Somewhat<br>representative of<br>the average<br>patient/community<br>member with Long<br>Covid (eg, age,<br>social class,<br>ethnicity etc.) in<br>the community | Drawn from the<br>same<br>community as<br>the exposed<br>cohort | Secure<br>record (eg<br>medical<br>records) | No | Both of the<br>above | Self-report (i.e.,<br>no reference to<br>original medical<br>records or<br>laboratory reports<br>to confirm the<br>outcome) | Yes (i.e.,<br>>4<br>weeks) | Subject<br>s lost<br>to<br>follow<br>up<br>unlikely<br>to<br>introdu<br>ce bias<br>(i.e.,<br>follow<br>up rate<br>><br>80%),<br>or<br>descrip<br>tion<br>provide<br>d of<br>those<br>lost | 7 | Low Risk |
| Boscolo<br>-Rizzo<br>et al.,<br>2021 | Somewhat<br>representative of<br>the average<br>patient/community<br>member with Long<br>Covid (eg, age,<br>social class,<br>ethnicity etc.) in<br>the community | Drawn from the<br>same<br>community as<br>the exposed<br>cohort | Secure<br>record (eg<br>medical<br>records) | No | Both of the<br>above | Record linkage<br>(e.g., identified<br>through ICD<br>codes on<br>database<br>records)                                      | Yes (i.e.,<br>>4<br>weeks) | No<br>statem<br>ent                                                                                                                                                                       | 7 | Low Risk |
| Cai et<br>al., 2023                  | Somewhat<br>representative of<br>the average<br>patient/community<br>member with Long<br>Covid (eg, age,<br>social class,<br>ethnicity etc.) in<br>the community | Drawn from the<br>same<br>community as<br>the exposed<br>cohort | Secure<br>record (eg<br>medical<br>records) | No | Both of the<br>above | Self-report (i.e.,<br>no reference to<br>original medical<br>records or<br>laboratory reports<br>to confirm the<br>outcome) | Yes (i.e.,<br>>4<br>weeks) | No<br>statem<br>ent                                                                                                                                                                       | 7 | Low Risk |

|                         |                                                                                                                                          |                                                     |                                    |    |                                                |                                                                                                           |                      |                                                                                                                           |   |             |
|-------------------------|------------------------------------------------------------------------------------------------------------------------------------------|-----------------------------------------------------|------------------------------------|----|------------------------------------------------|-----------------------------------------------------------------------------------------------------------|----------------------|---------------------------------------------------------------------------------------------------------------------------|---|-------------|
| deBruijn et al., 2024   | Somewhat representative of the average patient/community member with Long Covid (eg, age, social class, ethnicity etc.) in the community | Drawn from the same community as the exposed cohort | Secure record (eg medical records) | No | Both of the above                              | Self-report (i.e., no reference to original medical records or laboratory reports to confirm the outcome) | Yes (i.e., >4 weeks) | No statement                                                                                                              | 7 | Low Risk    |
| Desgranges et al., 2022 | Somewhat representative of the average patient/community member with Long Covid (eg, age, social class, ethnicity etc.) in the community | Drawn from the same community as the exposed cohort | Secure record (eg medical records) | No | Both of the above                              | Self-report (i.e., no reference to original medical records or laboratory reports to confirm the outcome) | Yes (i.e., >4 weeks) | No statement                                                                                                              | 6 | Medium Risk |
| Fjelltveit et al., 2023 | Somewhat representative of the average patient/community member with Long Covid (eg, age, social class, ethnicity etc.) in the community | Drawn from the same community as the exposed cohort | Secure record (eg medical records) | No | Study controls for age and sex in the analysis | Record linkage (e.g., identified through ICD codes on database records)                                   | Yes (i.e., >4 weeks) | Subjects lost to follow up unlikely to introduce bias (i.e., follow up rate > 80%), or description provided of those lost | 7 | Low Risk    |
| Funk et al., 2022       | Somewhat representative of the average patient/community member with Long Covid (eg, age,                                                | Drawn from the same community as the exposed cohort | Secure record (eg medical records) | No | Study controls for age and sex in the analysis | Record linkage (e.g., identified through ICD codes on database records)                                   | Yes (i.e., >4 weeks) | Subjects lost to follow up unlikely                                                                                       | 7 | Low Risk    |

|                     |                                                                                                                                          |                                                     |                                    |     |                   |  |                                                                                                           |                                                                                       |                                                                                                                            |                  |
|---------------------|------------------------------------------------------------------------------------------------------------------------------------------|-----------------------------------------------------|------------------------------------|-----|-------------------|--|-----------------------------------------------------------------------------------------------------------|---------------------------------------------------------------------------------------|----------------------------------------------------------------------------------------------------------------------------|------------------|
|                     | social class, ethnicity etc.) in the community                                                                                           |                                                     |                                    |     |                   |  |                                                                                                           | to introduce bias (i.e., follow up rate > 80%), or description provided of those lost |                                                                                                                            |                  |
| Golla et al., 2023  | Somewhat representative of the average patient/community member with Long Covid (eg, age, social class, ethnicity etc.) in the community | Drawn from the same community as the exposed cohort | Secure record (eg medical records) | Yes |                   |  | Self-report (i.e., no reference to original medical records or laboratory reports to confirm the outcome) | Yes (i.e., >4 weeks)                                                                  | Subject s lost to follow up unlikely to introduce bias (i.e., follow up rate > 80%), or description provided of those lost | 6<br>Medium Risk |
| Hastie et al., 2023 | Truly representative of the average patient/community member with Long Covid (eg, age, social class, ethnicity etc.) in the community    | Drawn from the same community as the exposed cohort | Secure record (eg medical records) | No  | Both of the above |  | Self-report (i.e., no reference to original medical records or laboratory reports to confirm the outcome) | Yes (i.e., >4 weeks)                                                                  | No statement                                                                                                               | 7<br>Low Risk    |

|                               |                                                                                                                                          |                                                     |                                    |     |                   |                                                                                                           |                      |                                                                                                                           |   |          |
|-------------------------------|------------------------------------------------------------------------------------------------------------------------------------------|-----------------------------------------------------|------------------------------------|-----|-------------------|-----------------------------------------------------------------------------------------------------------|----------------------|---------------------------------------------------------------------------------------------------------------------------|---|----------|
| Hernandez-Romieu et al., 2022 | Somewhat representative of the average patient/community member with Long Covid (eg, age, social class, ethnicity etc.) in the community | Drawn from the same community as the exposed cohort | Secure record (eg medical records) | Yes | Both of the above | Record linkage (e.g., identified through ICD codes on database records)                                   | Yes (i.e., >4 weeks) | No statement                                                                                                              | 8 | Low Risk |
| Horberg et al., 2022          | Somewhat representative of the average patient/community member with Long Covid (eg, age, social class, ethnicity etc.) in the community | Drawn from the same community as the exposed cohort | Secure record (eg medical records) | Yes | Both of the above | Record linkage (e.g., identified through ICD codes on database records)                                   | Yes (i.e., >4 weeks) | No statement                                                                                                              | 8 | Low Risk |
| Hosozawa et al., 2024         | Somewhat representative of the average patient/community member with Long Covid (eg, age, social class, ethnicity etc.) in the community | Drawn from the same community as the exposed cohort | Secure record (eg medical records) | No  | Both of the above | Self-report (i.e., no reference to original medical records or laboratory reports to confirm the outcome) | Yes (i.e., >4 weeks) | Subjects lost to follow up unlikely to introduce bias (i.e., follow up rate > 80%), or description provided of those lost | 8 | Low Risk |
| Huang et al., 2022            | Somewhat representative of the average patient/community member with Long Covid (eg, age,                                                | Drawn from the same community as the exposed cohort | Secure record (eg medical records) | Yes | Both of the above | Self-report (i.e., no reference to original medical records or laboratory reports                         | Yes (i.e., >4 weeks) | Follow up rate < 80% and no description of                                                                                | 7 | Low Risk |

|                      |                                                                                                                                          |                                                     |                                    |    |                   |                                                                                                           |                      |                                                                                                                           |   |             |
|----------------------|------------------------------------------------------------------------------------------------------------------------------------------|-----------------------------------------------------|------------------------------------|----|-------------------|-----------------------------------------------------------------------------------------------------------|----------------------|---------------------------------------------------------------------------------------------------------------------------|---|-------------|
|                      | social class, ethnicity etc.) in the community                                                                                           |                                                     |                                    |    |                   | to confirm the outcome)                                                                                   |                      | those lost                                                                                                                |   |             |
| Huynh et al., 2023   | Somewhat representative of the average patient/community member with Long Covid (eg, age, social class, ethnicity etc.) in the community | Drawn from the same community as the exposed cohort | Secure record (eg medical records) | No |                   | No description                                                                                            | Yes (i.e., >4 weeks) | No statement                                                                                                              | 4 | Medium Risk |
| Iba et al., 2024     | Somewhat representative of the average patient/community member with Long Covid (eg, age, social class, ethnicity etc.) in the community | Drawn from the same community as the exposed cohort | Secure record (eg medical records) | No | Both of the above | Self-report (i.e., no reference to original medical records or laboratory reports to confirm the outcome) | Yes (i.e., >4 weeks) | Subjects lost to follow up unlikely to introduce bias (i.e., follow up rate > 80%), or description provided of those lost | 8 | Low Risk    |
| Khullar et al., 2023 | Somewhat representative of the average patient/community member with Long Covid (eg, age, social class, ethnicity etc.) in the community | Drawn from the same community as the exposed cohort | Secure record (eg medical records) | No | Both of the above | Record linkage (e.g., identified through ICD codes on database records)                                   | Yes (i.e., >4 weeks) | No statement                                                                                                              | 7 | Low Risk    |
| Li et al., 2023      | Somewhat representative of the average                                                                                                   | Drawn from the same community as                    | Secure record (eg                  | No | Both of the above | Self-report (i.e., no reference to original medical                                                       | Yes (i.e., >4 weeks) | No statement                                                                                                              | 7 | Low Risk    |

|                       |                                                                                                                                          |                                                     |                                    |    |                   |                                                                                                           |                      |              |   |             |
|-----------------------|------------------------------------------------------------------------------------------------------------------------------------------|-----------------------------------------------------|------------------------------------|----|-------------------|-----------------------------------------------------------------------------------------------------------|----------------------|--------------|---|-------------|
|                       | patient/community member with Long Covid (eg, age, social class, ethnicity etc.) in the community                                        | the exposed cohort                                  | medical records)                   |    |                   | records or laboratory reports to confirm the outcome)                                                     |                      |              |   |             |
| Marasco et al., 2022  | Somewhat representative of the average patient/community member with Long Covid (eg, age, social class, ethnicity etc.) in the community | Drawn from the same community as the exposed cohort | Secure record (eg medical records) | No | Both of the above | Self-report (i.e., no reference to original medical records or laboratory reports to confirm the outcome) | Yes (i.e., >4 weeks) | No statement | 7 | Low Risk    |
| Nehme et al., 2022    | Somewhat representative of the average patient/community member with Long Covid (eg, age, social class, ethnicity etc.) in the community | Drawn from the same community as the exposed cohort | Secure record (eg medical records) | No | Both of the above | Self-report (i.e., no reference to original medical records or laboratory reports to confirm the outcome) | Yes (i.e., >4 weeks) | No statement | 7 | Low Risk    |
| Newlands et al., 2023 | Somewhat representative of the average patient/community member with Long Covid (eg, age, social class, ethnicity etc.) in the community | Drawn from the same community as the exposed cohort | Secure record (eg medical records) | No |                   | Self-report (i.e., no reference to original medical records or laboratory reports to confirm the outcome) | Yes (i.e., >4 weeks) | No statement | 5 | Medium Risk |
| Noviello et al., 2022 | Somewhat representative of the average patient/community member with Long Covid (eg, age, social class, ethnicity etc.) in the community | Drawn from the same community as the exposed cohort | Secure record (eg medical records) | No | Both of the above | Self-report (i.e., no reference to original medical records or laboratory reports to confirm the outcome) | Yes (i.e., >4 weeks) | No statement | 7 | Low Risk    |
| Nugawela et al., 2022 | Truly representative of the average                                                                                                      | Drawn from the same community as                    | Secure record (eg                  | No | Both of the above | Self-report (i.e., no reference to original medical                                                       | Yes (i.e., >4 weeks) | No statement | 6 | Medium Risk |

|                            |                                                                                                                                                 |                                                            |                                    |    |                   |                                                                                                           |                      |                                                                             |   |             |
|----------------------------|-------------------------------------------------------------------------------------------------------------------------------------------------|------------------------------------------------------------|------------------------------------|----|-------------------|-----------------------------------------------------------------------------------------------------------|----------------------|-----------------------------------------------------------------------------|---|-------------|
|                            | patient/community member with Long Covid (eg, age, social class, ethnicity etc.) in the community                                               | the exposed cohort                                         | medical records)                   |    |                   | records or laboratory reports to confirm the outcome)                                                     |                      |                                                                             |   |             |
| Pagen et al., 2023         | Somewhat representative of the average patient/community member with Long Covid (eg, age, social class, ethnicity etc.) in the community        | Drawn from the same community as the exposed cohort        | Secure record (eg medical records) | No | Both of the above | Self-report (i.e., no reference to original medical records or laboratory reports to confirm the outcome) | Yes (i.e., >4 weeks) | No statement                                                                | 7 | Low Risk    |
| Park, et al. 2021          | Somewhat representative of the average patient/community member with Long Covid (eg, age, social class, ethnicity etc.) in the community        | Drawn from the same community as the exposed cohort        | Secure record (eg medical records) | No | Both of the above | Record linkage (e.g., identified through ICD codes on database records)                                   | Yes (i.e., >4 weeks) | No statement                                                                | 7 | Low Risk    |
| Pihlaja et al., 2023       | Selected groups of patients/community members (eg, health care workers, pregnant populations, patients attending specialist Long Covid clinics) | No description of the derivation of the non exposed cohort | Secure record (eg medical records) | No | Both of the above | No description                                                                                            | Yes (i.e., >4 weeks) | No statement                                                                | 4 | Medium Risk |
| Pinto Pereira et al., 2023 | Somewhat representative of the average patient/community member with Long Covid (eg, age, social class, ethnicity etc.) in the community        | Drawn from the same community as the exposed cohort        | Secure record (eg medical records) | No | Both of the above | Self-report (i.e., no reference to original medical records or laboratory reports to confirm the outcome) | Yes (i.e., >4 weeks) | Subjects lost to follow up unlikely to introduce bias (i.e., follow up rate | 8 | Low Risk    |

|                               |                                                                                                                                          |                                                     |                                    |    |                                                |                                                                                                           |                      |                                               |   |             |
|-------------------------------|------------------------------------------------------------------------------------------------------------------------------------------|-----------------------------------------------------|------------------------------------|----|------------------------------------------------|-----------------------------------------------------------------------------------------------------------|----------------------|-----------------------------------------------|---|-------------|
|                               |                                                                                                                                          |                                                     |                                    |    |                                                |                                                                                                           |                      | > 80%), or description provided of those lost |   |             |
| Radtke, et al. 2021           | Somewhat representative of the average patient/community member with Long Covid (eg, age, social class, ethnicity etc.) in the community | Drawn from the same community as the exposed cohort | Secure record (eg medical records) | No |                                                | Self-report (i.e., no reference to original medical records or laboratory reports to confirm the outcome) | Yes (i.e., >4 weeks) | No statement                                  | 5 | Medium Risk |
| Rao et al., 2022              | Truly representative of the average patient/community member with Long Covid (eg, age, social class, ethnicity etc.) in the community    | Drawn from the same community as the exposed cohort | Secure record (eg medical records) | No | Both of the above                              | Record linkage (e.g., identified through ICD codes on database records)                                   | Yes (i.e., >4 weeks) | No statement                                  | 7 | Low Risk    |
| Rivera-Izquierdo et al., 2022 | Somewhat representative of the average patient/community member with Long Covid (eg, age, social class, ethnicity etc.) in the community | Drawn from the same community as the exposed cohort | Secure record (eg medical records) | no | Both of the above                              | Self-report (i.e., no reference to original medical records or laboratory reports to confirm the outcome) | Yes (i.e., >4 weeks) | No statement                                  | 7 | Low Risk    |
| Roge, et al. 2021             | Somewhat representative of the average patient/community member with Long Covid (eg, age, social class, ethnicity etc.) in the community | Drawn from a different source                       | Structured interview               | No | Study controls for age and sex in the analysis | Self-report (i.e., no reference to original medical records or laboratory reports to confirm the outcome) | Yes (i.e., >4 weeks) | No statement                                  | 4 | Medium Risk |



|                      |                                                                                                                                          |                                                     |                                    |    |                                                |                                                                                                           |                      |                                                                                                                           |   |             |
|----------------------|------------------------------------------------------------------------------------------------------------------------------------------|-----------------------------------------------------|------------------------------------|----|------------------------------------------------|-----------------------------------------------------------------------------------------------------------|----------------------|---------------------------------------------------------------------------------------------------------------------------|---|-------------|
| Seery et al., 2023   | Somewhat representative of the average patient/community member with Long Covid (eg, age, social class, ethnicity etc.) in the community | Drawn from the same community as the exposed cohort | Secure record (eg medical records) | No | Both of the above                              | Self-report (i.e., no reference to original medical records or laboratory reports to confirm the outcome) | Yes (i.e., >4 weeks) | Subjects lost to follow up unlikely to introduce bias (i.e., follow up rate > 80%), or description provided of those lost | 8 | Low Risk    |
| Shah et al., 2023    | Somewhat representative of the average patient/community member with Long Covid (eg, age, social class, ethnicity etc.) in the community | Drawn from the same community as the exposed cohort | Secure record (eg medical records) | No | Both of the above                              | Record linkage (e.g., identified through ICD codes on database records)                                   | Yes (i.e., >4 weeks) | Subjects lost to follow up unlikely to introduce bias (i.e., follow up rate > 80%), or description provided of those lost | 8 | Low Risk    |
| Sneller et al., 2022 | Selected groups of patients/community members (eg,                                                                                       | Drawn from the same community as                    | Structured interview               | No | Study controls for age and sex in the analysis | Self-report (i.e., no reference to original medical                                                       | Yes (i.e., >4 weeks) | No statement                                                                                                              | 4 | Medium Risk |

|                          |                                                                                                                                          |                                                     |                                    |    |                                                |                                                                                                           |                      |                                                                                                                           |   |          |
|--------------------------|------------------------------------------------------------------------------------------------------------------------------------------|-----------------------------------------------------|------------------------------------|----|------------------------------------------------|-----------------------------------------------------------------------------------------------------------|----------------------|---------------------------------------------------------------------------------------------------------------------------|---|----------|
|                          | health care workers, pregnant populations, patients attending specialist Long Covid clinics)                                             | the exposed cohort                                  |                                    |    |                                                | records or laboratory reports to confirm the outcome)                                                     |                      |                                                                                                                           |   |          |
| Subramanian et al., 2022 | Truly representative of the average patient/community member with Long Covid (eg, age, social class, ethnicity etc.) in the community    | Drawn from the same community as the exposed cohort | Secure record (eg medical records) | No | Both of the above                              | Record linkage (e.g., identified through ICD codes on database records)                                   | Yes (i.e., >4 weeks) | No statement                                                                                                              | 7 | Low Risk |
| Thors et al., 2024       | Somewhat representative of the average patient/community member with Long Covid (eg, age, social class, ethnicity etc.) in the community | Drawn from the same community as the exposed cohort | Secure record (eg medical records) | No | Study controls for age and sex in the analysis | Self-report (i.e., no reference to original medical records or laboratory reports to confirm the outcome) | Yes (i.e., >4 weeks) | Subjects lost to follow up unlikely to introduce bias (i.e., follow up rate > 80%), or description provided of those lost | 7 | Low Risk |
| Tisler et al., 2022      | Truly representative of the average patient/community member with Long Covid (eg, age, social class, ethnicity etc.) in the community    | Drawn from the same community as the exposed cohort | Secure record (eg medical records) | No | Both of the above                              | Record linkage (e.g., identified through ICD codes on database records)                                   | Yes (i.e., >4 weeks) | No statement                                                                                                              | 7 | Low Risk |

|                            |                                                                                                                                          |                                                     |                                    |    |                   |                                                                                                           |                      |                                                                                                                           |   |             |
|----------------------------|------------------------------------------------------------------------------------------------------------------------------------------|-----------------------------------------------------|------------------------------------|----|-------------------|-----------------------------------------------------------------------------------------------------------|----------------------|---------------------------------------------------------------------------------------------------------------------------|---|-------------|
| Vander Maaden et al., 2023 | Somewhat representative of the average patient/community member with Long Covid (eg, age, social class, ethnicity etc.) in the community | Drawn from the same community as the exposed cohort | Secure record (eg medical records) | No | Both of the above | Self-report (i.e., no reference to original medical records or laboratory reports to confirm the outcome) | Yes (i.e., >4 weeks) | Subjects lost to follow up unlikely to introduce bias (i.e., follow up rate > 80%), or description provided of those lost | 8 | Low Risk    |
| VanHerck et al., 2024      | Somewhat representative of the average patient/community member with Long Covid (eg, age, social class, ethnicity etc.) in the community | Drawn from the same community as the exposed cohort | Secure record (eg medical records) | No | Both of the above | Self-report (i.e., no reference to original medical records or laboratory reports to confirm the outcome) | Yes (i.e., >4 weeks) | Subjects lost to follow up unlikely to introduce bias (i.e., follow up rate > 80%), or description provided of those lost | 8 | Low Risk    |
| Xiong et al., 2021         | Somewhat representative of the average                                                                                                   | Drawn from a different source                       | Secure record (eg                  | No | 0                 | Self-report (i.e., no reference to original medical                                                       | Yes (i.e., >4 weeks) | Subjects lost to                                                                                                          | 6 | Medium Risk |

|                    |                                                                                                                                          |                                                     |                                    |    |                   |                                                                         |                      |                                                                                                                           |   |          |
|--------------------|------------------------------------------------------------------------------------------------------------------------------------------|-----------------------------------------------------|------------------------------------|----|-------------------|-------------------------------------------------------------------------|----------------------|---------------------------------------------------------------------------------------------------------------------------|---|----------|
|                    | patient/community member with Long Covid (eg, age, social class, ethnicity etc.) in the community                                        |                                                     | medical records)                   |    |                   | records or laboratory reports to confirm the outcome)                   |                      | follow up unlikely to introduce bias (i.e., follow up rate > 80%), or description provided of those lost                  |   |          |
| Xu et al., 2022    | Somewhat representative of the average patient/community member with Long Covid (eg, age, social class, ethnicity etc.) in the community | Drawn from the same community as the exposed cohort | Secure record (eg medical records) | No | Both of the above | Record linkage (e.g., identified through ICD codes on database records) | Yes (i.e., >4 weeks) | Subjects lost to follow up unlikely to introduce bias (i.e., follow up rate > 80%), or description provided of those lost | 8 | Low Risk |
| Zhang et al., 2024 | Truly representative of the average patient/community member with Long Covid (eg, age,                                                   | Drawn from the same community as the exposed cohort | Secure record (eg medical records) | No | Both of the above | Record linkage (e.g., identified through ICD codes on database records) | Yes (i.e., >4 weeks) | No statement                                                                                                              | 7 | Low Risk |

|                   |                                                                                                                                          |                                                     |                                    |    |                                                |                                                                         |                      |              |   |             |
|-------------------|------------------------------------------------------------------------------------------------------------------------------------------|-----------------------------------------------------|------------------------------------|----|------------------------------------------------|-------------------------------------------------------------------------|----------------------|--------------|---|-------------|
|                   | social class, ethnicity etc.) in the community                                                                                           |                                                     |                                    |    |                                                |                                                                         |                      |              |   |             |
| Zhao et al., 2024 | Somewhat representative of the average patient/community member with Long Covid (eg, age, social class, ethnicity etc.) in the community | Drawn from the same community as the exposed cohort | Secure record (eg medical records) | No | Study controls for age and sex in the analysis | Record linkage (e.g., identified through ICD codes on database records) | Yes (i.e., >4 weeks) | No statement | 6 | Medium Risk |

To assess the risk of bias of included studies, an adjusted version of the Newcastle-Ottawa Scale was used. Each study received an overall risk of bias rating of low, medium or high. \*Both of the above refers to (i) Study controls for age and sex in the analysis; (ii) Study controls for any additional factors (e.g. co-morbidities, race/ethnicity, socio-economic status, education).

**Supplementary Table 5 : Meta-regressions to assess if study level characteristics were associated with estimated effect size**

| Study level variable             | N studies | Coefficient (95% CI)           | p-value          |
|----------------------------------|-----------|--------------------------------|------------------|
| <b>% Male</b>                    |           |                                |                  |
| Fatigue                          | 29        | 0.023 (-0.023, 0.069)          | 0.314            |
| <b>Fever</b>                     | <b>10</b> | <b>0.075 (0.051, 0.099)</b>    | <b>&lt;0.001</b> |
| Menstrual changes                | 3         | Insufficient observations      |                  |
| Change in appetite               | 11        | -0.001 (-0.071, 0.068)         | 0.968            |
| Weight loss                      | 9         | 0.069 (-0.017, 0.155)          | 0.124            |
| Dizziness                        | 18        | 0.003 (-0.009, 0.015)          | 0.612            |
| Muscle weakness/pain             | 20        | 0.002 (-0.020, 0.026)          | 0.832            |
| Joint pain                       | 13        | 0.002 (-0.018, 0.023)          | 0.795            |
| Pain/discomfort                  | 7         | 0.049 (-0.015, 0.114)          | 0.110            |
| Breathlessness                   | 23        | -0.009 (-0.060, 0.043)         | 0.730            |
| Indigestion                      | 3         | Insufficient observations      |                  |
| <b>Cough</b>                     | <b>19</b> | <b>0.060 (0.005, 0.114)</b>    | <b>0.033</b>     |
| Chest paint/tightness            | 20        | 0.007 (-0.031, 0.045)          | 0.702            |
| Palpitations                     | 10        | 0.011 (-0.056, 0.077)          | 0.722            |
| Hoarse voice                     | 5         | 0.128 (-0.122, 0.378)          | 0.202            |
| Diarrhoea                        | 10        | -0.016 (-0.034, 0.002)         | 0.077            |
| Constipation                     | 5         | -0.007 (-0.049, 0.035)         | 0.637            |
| Gastro-intestinal problems       | 8         | -0.005 (-0.045, 0.035)         | 0.761            |
| Vomiting/nausea                  | 16        | 0.048 (0.015, 0.081)           | 0.007            |
| Abdominal pain                   | 13        | 0.001 (-0.038, 0.039)          | 0.977            |
| Sore throat                      | 12        | 0.003 (-0.002, 0.110)          | 0.056            |
| Nasal symptoms                   | 10        | 0.062 (-0.042, 0.165)          | 0.209            |
| Headache/migraine                | 29        | 0.003 (-0.017, 0.023)          | 0.755            |
| Loss of smell                    | 17        | -0.006 (-0.043, 0.031)         | 0.736            |
| Loss of taste                    | 12        | -0.005 (-0.042, 0.031)         | 0.749            |
| Affected vision/eye problems     | 12        | 0.007 (-0.008, 0.022)          | 0.336            |
| Affected hearing                 | 10        | 0.000 (-0.004, 0.004)          | 0.976            |
| Affected sleep                   | 20        | 0.011 (-0.054, 0.075)          | 0.737            |
| Anxiety                          | 16        | 0.009 (-0.005, 0.022)          | 0.186            |
| Depression                       | 16        | 0.009 (-0.004, 0.022)          | 0.148            |
| PTSD                             | 4         | 0.014 (-0.235, 0.263)          | 0.832            |
| Impaired mobility/walking        | 4         | -0.029 (-0.079, 0.022)         | 0.135            |
| Vertigo/balance issues           | 5         | -0.004 (-0.084, 0.077)         | 0.892            |
| Paraesthesia                     | 8         | 0.001 (-0.009, 0.012)          | 0.769            |
| Chills/ shivers                  | 3         | Insufficient observations      |                  |
| Impaired memory                  | 11        | -0.007 (-0.041, 0.027)         | 0.654            |
| Poor concentration               | 10        | 0.006 (-0.114, 0.126)          | 0.913            |
| Cognitive dysfunction/impairment | 8         | 0.002 (-0.068, 0.073)          | 0.927            |
| Confusion/brain fog              | 8         | -0.016 (-0.112, 0.080)         | 0.698            |
| At least 1 symptom at follow-up  | 11        | -0.009 (-0.089, 0.070)         | 0.799            |
| <b>Hair loss/alopecia</b>        | <b>10</b> | <b>-0.070 (-0.130, -0.011)</b> | <b>0.026</b>     |
| Dermatological problems          | 16        | 0.004 (-0.064, 0.072)          | 0.896            |
| <b>Mean follow-up (days)</b>     |           |                                |                  |
| Fatigue                          | 24        | -0.001 (-0.004, 0.001)         | 0.279            |
| Fever                            | 11        | -0.001 (-0.005, 0.003)         | 0.494            |
| Menstrual changes                | 3         | Insufficient observations      |                  |
| Change in appetite               | 9         | 0.001 (-0.001, 0.003)          | 0.383            |
| Weight loss                      | 3         | Insufficient observations      |                  |
| Dizziness                        | 16        | 0.001 (-0.000, 0.002)          | 0.228            |
| Muscle weakness/pain             | 18        | 0.002 (-0.001, 0.004)          | 0.142            |
| Joint pain                       | 12        | 0.001 (-0.001, 0.002)          | 0.219            |
| Pain/discomfort                  | 6         | 0.002 (-0.000, 0.004)          | 0.052            |
| Breathlessness                   | 18        | -0.001 (-0.003, 0.001)         | 0.360            |
| Indigestion                      | 3         | Insufficient observations      |                  |
| Cough                            | 17        | 0.001 (-0.002, 0.003)          | 0.515            |
| Chest paint/tightness            | 18        | 0.001 (-0.000, 0.003)          | 0.054            |
| Palpitations                     | 9         | 0.002 (0.001, 0.002)           | 0.009            |
| Hoarse voice                     | 4         | -0.005 (-0.030, 0.019)         | 0.484            |

|                                  |    |                           |       |
|----------------------------------|----|---------------------------|-------|
| Diarrhoea                        | 10 | 0.000 (-0.002, 0.003)     | 0.718 |
| Constipation                     | 4  | 0.000 (-0.001, 0.001)     | 0.953 |
| Gastro-intestinal problems       | 7  | 0.002 (-0.001, 0.004)     | 0.118 |
| Vomiting/nausea                  | 14 | 0.001 (-0.001, 0.003)     | 0.349 |
| Abdominal pain                   | 10 | -0.000 (-0.001, 0.001)    | 0.856 |
| Sore throat                      | 12 | 0.003 (-0.000, 0.006)     | 0.072 |
| Nasal symptoms                   | 8  | -0.002 (-0.008, 0.004)    | 0.442 |
| Headache/migraine                | 24 | 0.001 (-0.001, 0.003)     | 0.170 |
| Loss of smell                    | 14 | 0.002 (-0.001, 0.006)     | 0.182 |
| Loss of taste                    | 10 | 0.000 (-0.004, 0.004)     | 0.858 |
| Affected vision/eye problems     | 12 | 0.001 (-0.001, 0.003)     | 0.211 |
| Affected hearing                 | 10 | 0.000 (-0.001, 0.001)     | 0.177 |
| Affected sleep                   | 17 | 0.000 (-0.003, 0.003)     | 0.970 |
| Anxiety                          | 14 | 0.001 (-0.000, 0.003)     | 0.121 |
| Depression                       | 15 | 0.001 (0.001, 0.003)      | 0.278 |
| PTSD                             | 3  | Insufficient observations |       |
| Impaired mobility/walking        | 4  | -0.001 (-0.003, 0.001)    | 0.143 |
| Vertigo/balance issues           | 4  | 0.001 (-0.002, 0.003)     | 0.231 |
| Paraesthesia                     | 7  | 0.001 (-0.000, 0.002)     | 0.116 |
| Chills/ shivers                  | 4  | -0.005 (-0.012, 0.002)    | 0.086 |
| Impaired memory                  | 9  | -0.001 (-0.006, 0.004)    | 0.623 |
| Poor concentration               | 7  | 0.002 (-0.004, 0.008)     | 0.434 |
| Cognitive dysfunction/impairment | 3  | Insufficient observations |       |
| Confusion/brain fog              | 9  | -0.001 (-0.004, 0.003)    | 0.696 |
| At least 1 symptom at follow-up  | 9  | -0.001 (-0.005, 0.004)    | 0.759 |
| Hair loss/alopecia               | 10 | -0.000 (-0.004, 0.004)    | 0.840 |
| Dermatological problems          | 14 | 0.003 (-0.000, 0.007)     | 0.050 |
| Mean age (years)                 |    |                           |       |
| Fatigue                          | 21 | -0.012 (-0.03, 0.009)     | 0.240 |
| Fever                            | 7  | -0.009 (-0.038, 0.021)    | 0.496 |
| Menstrual changes                | 3  | Insufficient observations |       |
| Change in appetite               | 9  | -0.001 (-0.043, 0.030)    | 0.691 |
| Weight loss                      | 4  | -0.032 (-0.074, 0.011)    | 0.084 |
| Dizziness                        | 14 | -0.003 (0.024, 0.019)     | 0.799 |
| Muscle weakness/pain             | 18 | -0.000 (-0.023, 0.022)    | 0.975 |
| Joint pain                       | 13 | -0.015 (-0.057, 0.027)    | 0.445 |
| Pain/discomfort                  | 6  | 0.008 (-0.031, 0.047)     | 0.592 |
| Breathlessness                   | 16 | -0.007 (-0.034, 0.021)    | 0.598 |
| Indigestion                      | 3  | Insufficient observations |       |
| Cough                            | 16 | -0.004 (-0.032, 0.025)    | 0.775 |
| Chest pain/tightness             | 16 | 0.005 (0.016, 0.026)      | 0.631 |
| Palpitations                     | 9  | 0.004 (-0.031, 0.040)     | 0.778 |
| Hoarse voice                     | 4  | 0.011 (-0.188, 0.210)     | 0.836 |
| Diarrhoea                        | 10 | -0.10 (-0.034, 0.014)     | 0.366 |
| Constipation                     | 5  | -0.017 (-0.051, 0.017)    | 0.214 |
| Gastro-intestinal problems       | 6  | 0.010 (-0.027, 0.048)     | 0.487 |
| Vomiting/nausea                  | 15 | 0.008 (-0.014, 0.029)     | 0.455 |
| Abdominal pain                   | 10 | -0.027 (-0.050, -0.003)   | 0.028 |
| Sore throat                      | 9  | 0.018 (-0.029, 0.065)     | 0.392 |
| Nasal symptoms                   | 9  | -0.020 (-0.055, 0.015)    | 0.223 |
| Headache/migraine                | 21 | -0.017 (-0.039, 0.005)    | 0.121 |
| Loss of smell                    | 14 | 0.007 (-0.026, 0.039)     | 0.652 |
| Loss of taste                    | 12 | -0.028 (-0.077, 0.021)    | 0.229 |
| Affected vision/eye problems     | 9  | 0.003 (-0.030, 0.035)     | 0.846 |
| Affected hearing                 | 9  | 0.004 (0.000, 0.008)      | 0.045 |
| Affected sleep                   | 15 | 0.008 (-0.029, 0.044)     | 0.660 |
| Anxiety                          | 12 | 0.007 (-0.005, 0.019)     | 0.249 |
| Depression                       | 13 | 0.014 (-0.003, 0.030)     | 0.102 |
| PTSD                             | 3  | Insufficient observations |       |
| Impaired mobility/walking        | 3  | Insufficient observations |       |
| Vertigo/balance issues           | 5  | -0.005 (-0.065, 0.055)    | 0.819 |
| Paraesthesia                     | 8  | -0.005 (-0.036, 0.026)    | 0.728 |
| Chills/ shivers                  | 3  | Insufficient observations |       |
| Impaired memory                  | 11 | -0.006 (-0.043, 0.029)    | 0.700 |

|                                  |    |                        |       |
|----------------------------------|----|------------------------|-------|
| Poor concentration               | 9  | 0.008 (-0.042, 0.057)  | 0.725 |
| Cognitive dysfunction/impairment | 4  | 0.050 (-0.081, 0.181)  | 0.245 |
| Confusion/brain fog              | 4  | -0.018 (-0.251, 0.214) | 0.770 |
| At least 1 symptom at follow-up  | 11 | 0.007 (-0.025, 0.039)  | 0.630 |
| Hair loss/alopecia               | 10 | 0.018 (-0.028, 0.063)  | 0.397 |
| Dermatological problems          | 16 | -0.010 (-0.045, 0.025) | 0.529 |

Post-hoc meta-regression analysis (2-sided and no adjustment made for multiple comparisons).



**Supplementary Fig. 1: Forest plot of pooled relative risks for each symptom (studies of hospitalised participants at time of covid infection)**

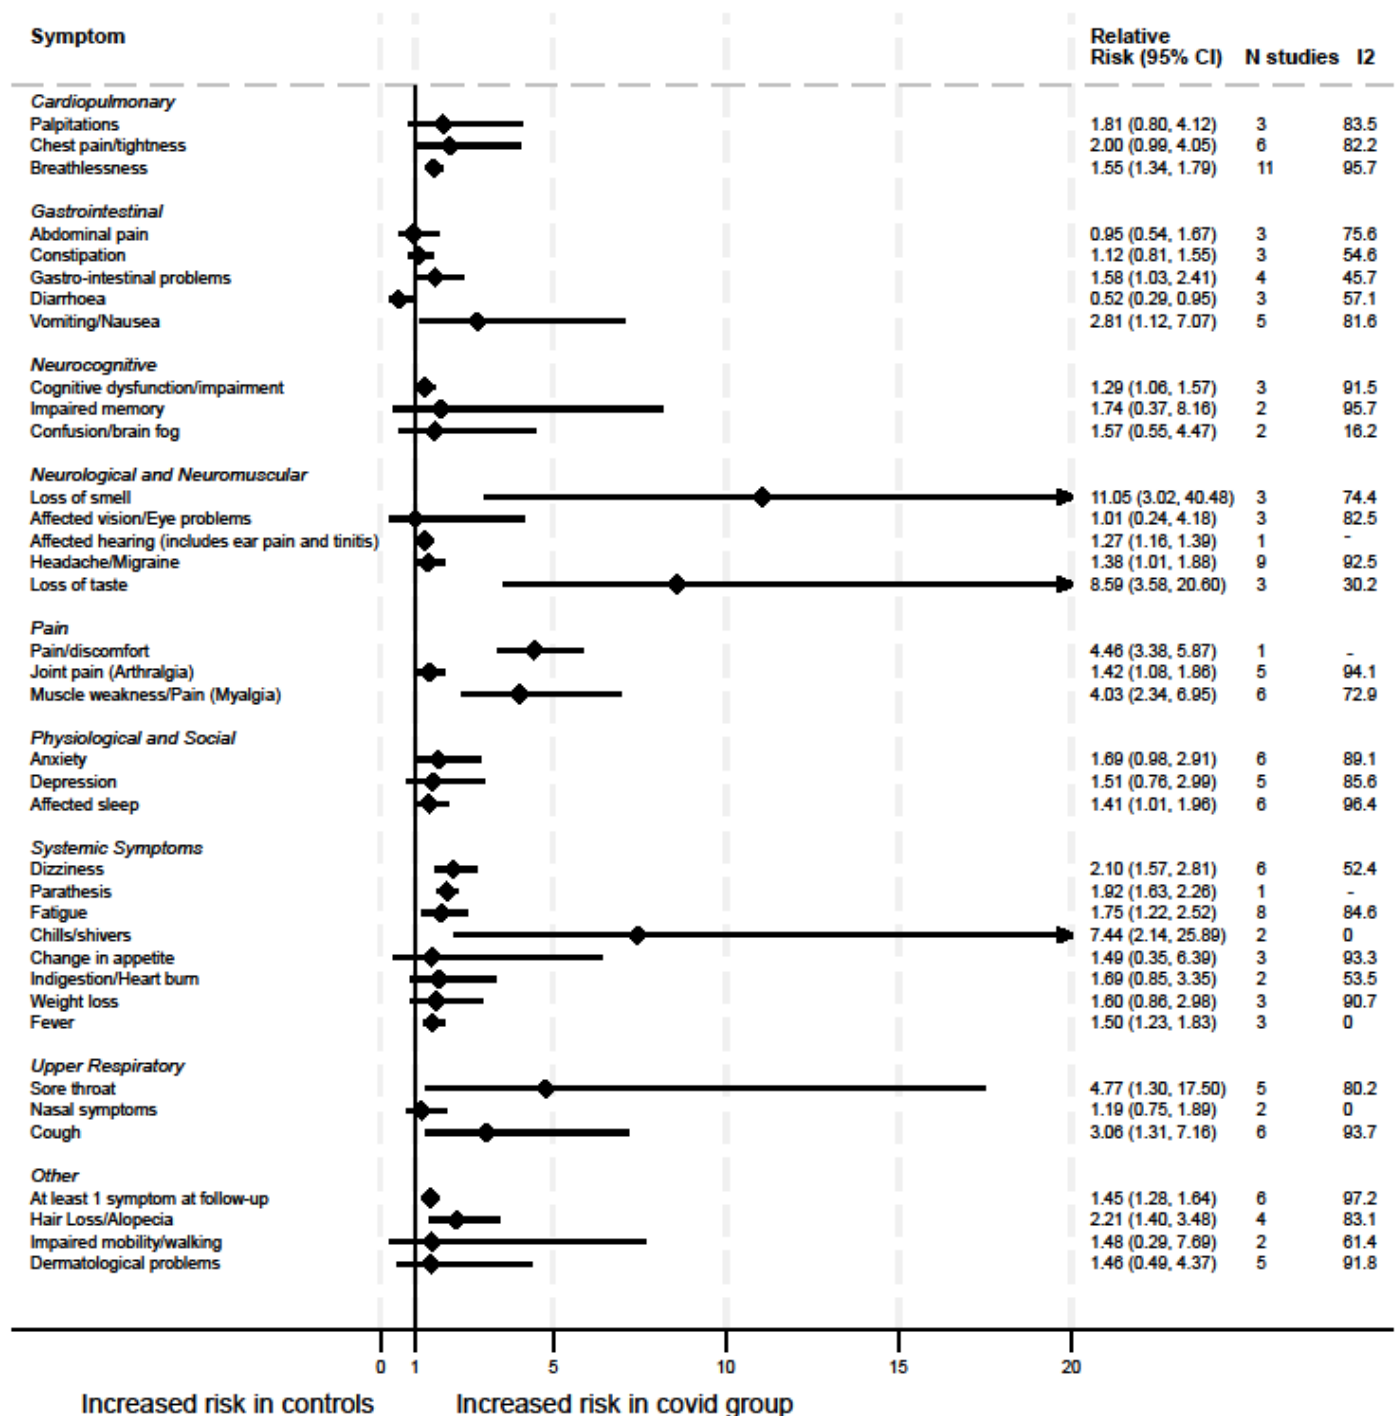

Illustrates pooled relative risks and associated 95% confidence intervals for each symptom using random effects models. All tests were 2-sided and no adjustment was made for multiple comparisons. Heterogeneity was assessed using Higgins I<sup>2</sup> statistic (I<sup>2</sup> between 75% - 100% indicates considerable between study heterogeneity).

**Supplementary Fig. 2: Forest plot of pooled relative risks for each symptom (studies of non-hospitalised participants at time of covid infection)**

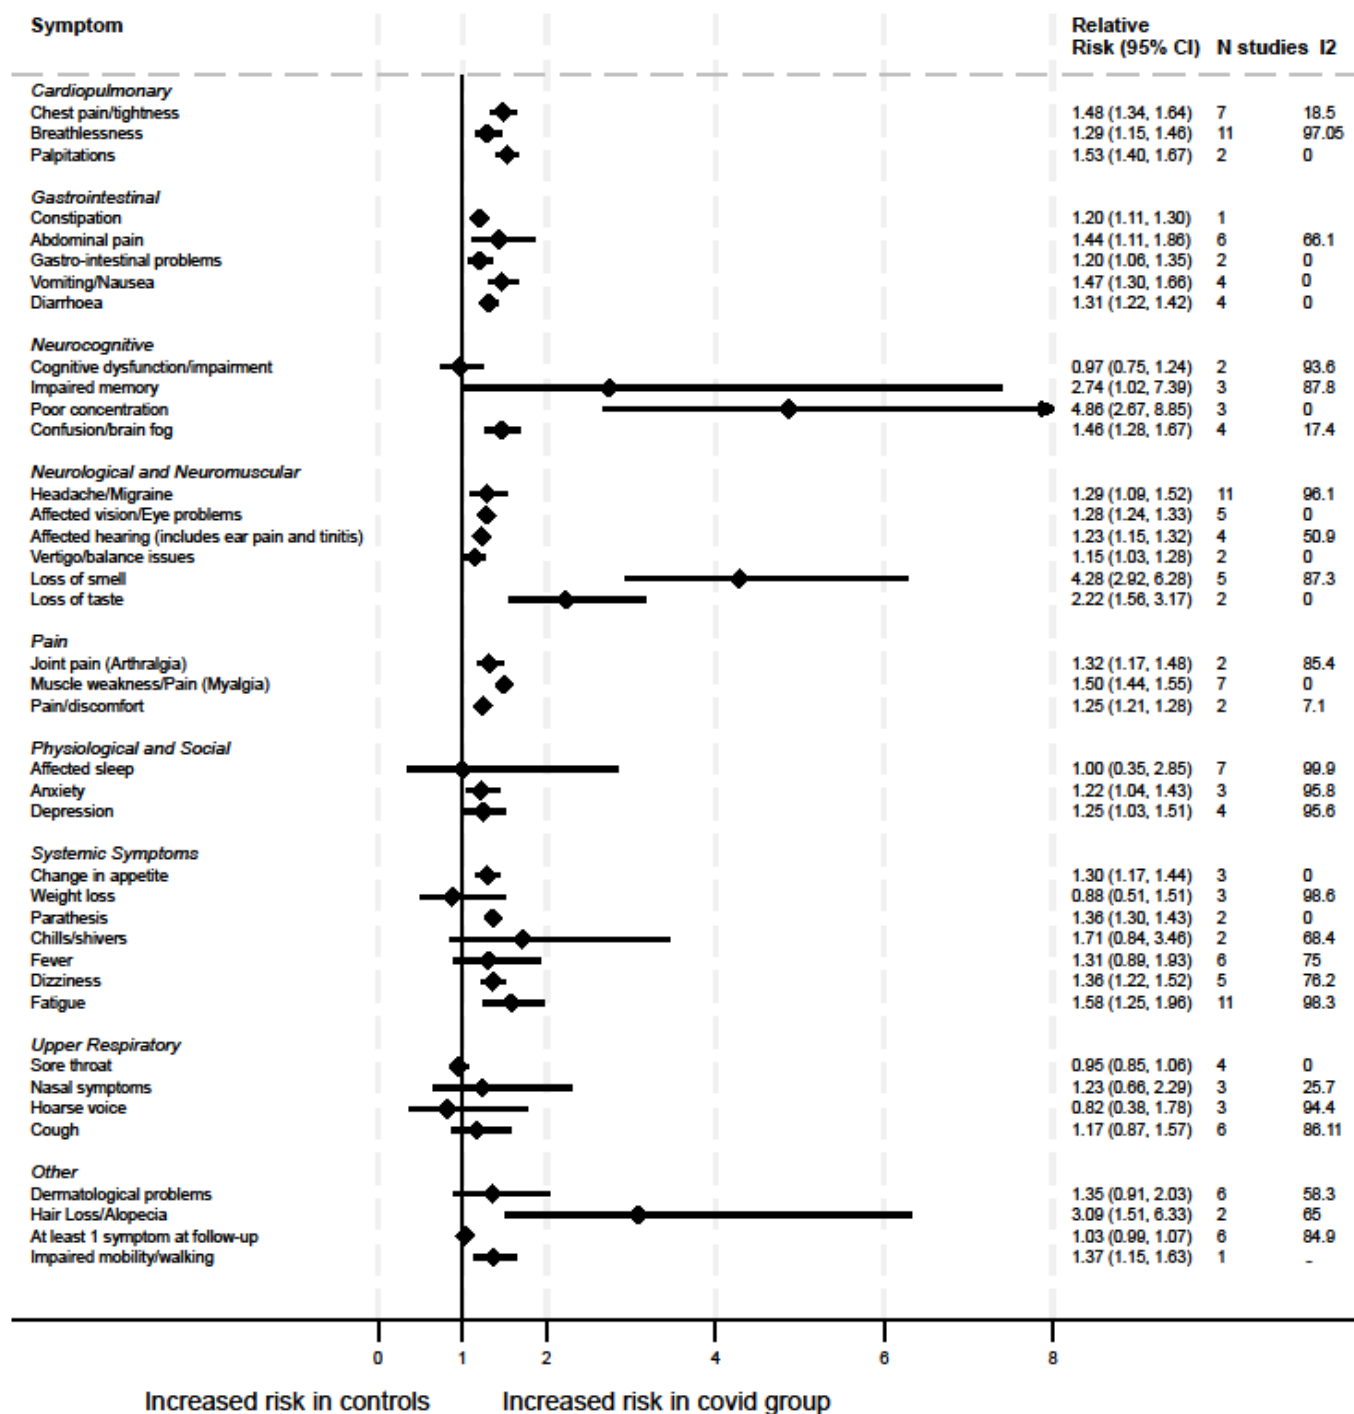

Illustrates pooled relative risks and associated 95% confidence intervals for each symptom using random effects models. All tests were 2-sided and no adjustment was made for multiple comparisons. Heterogeneity was assessed using Higgins I<sup>2</sup> statistic (I<sup>2</sup> between 75% - 100% indicates considerable between study heterogeneity).

**Supplementary Fig. 3: Forest plot of pooled relative risks for each symptom (studies of hospitalised and non-hospitalised participants at time of covid infection)**

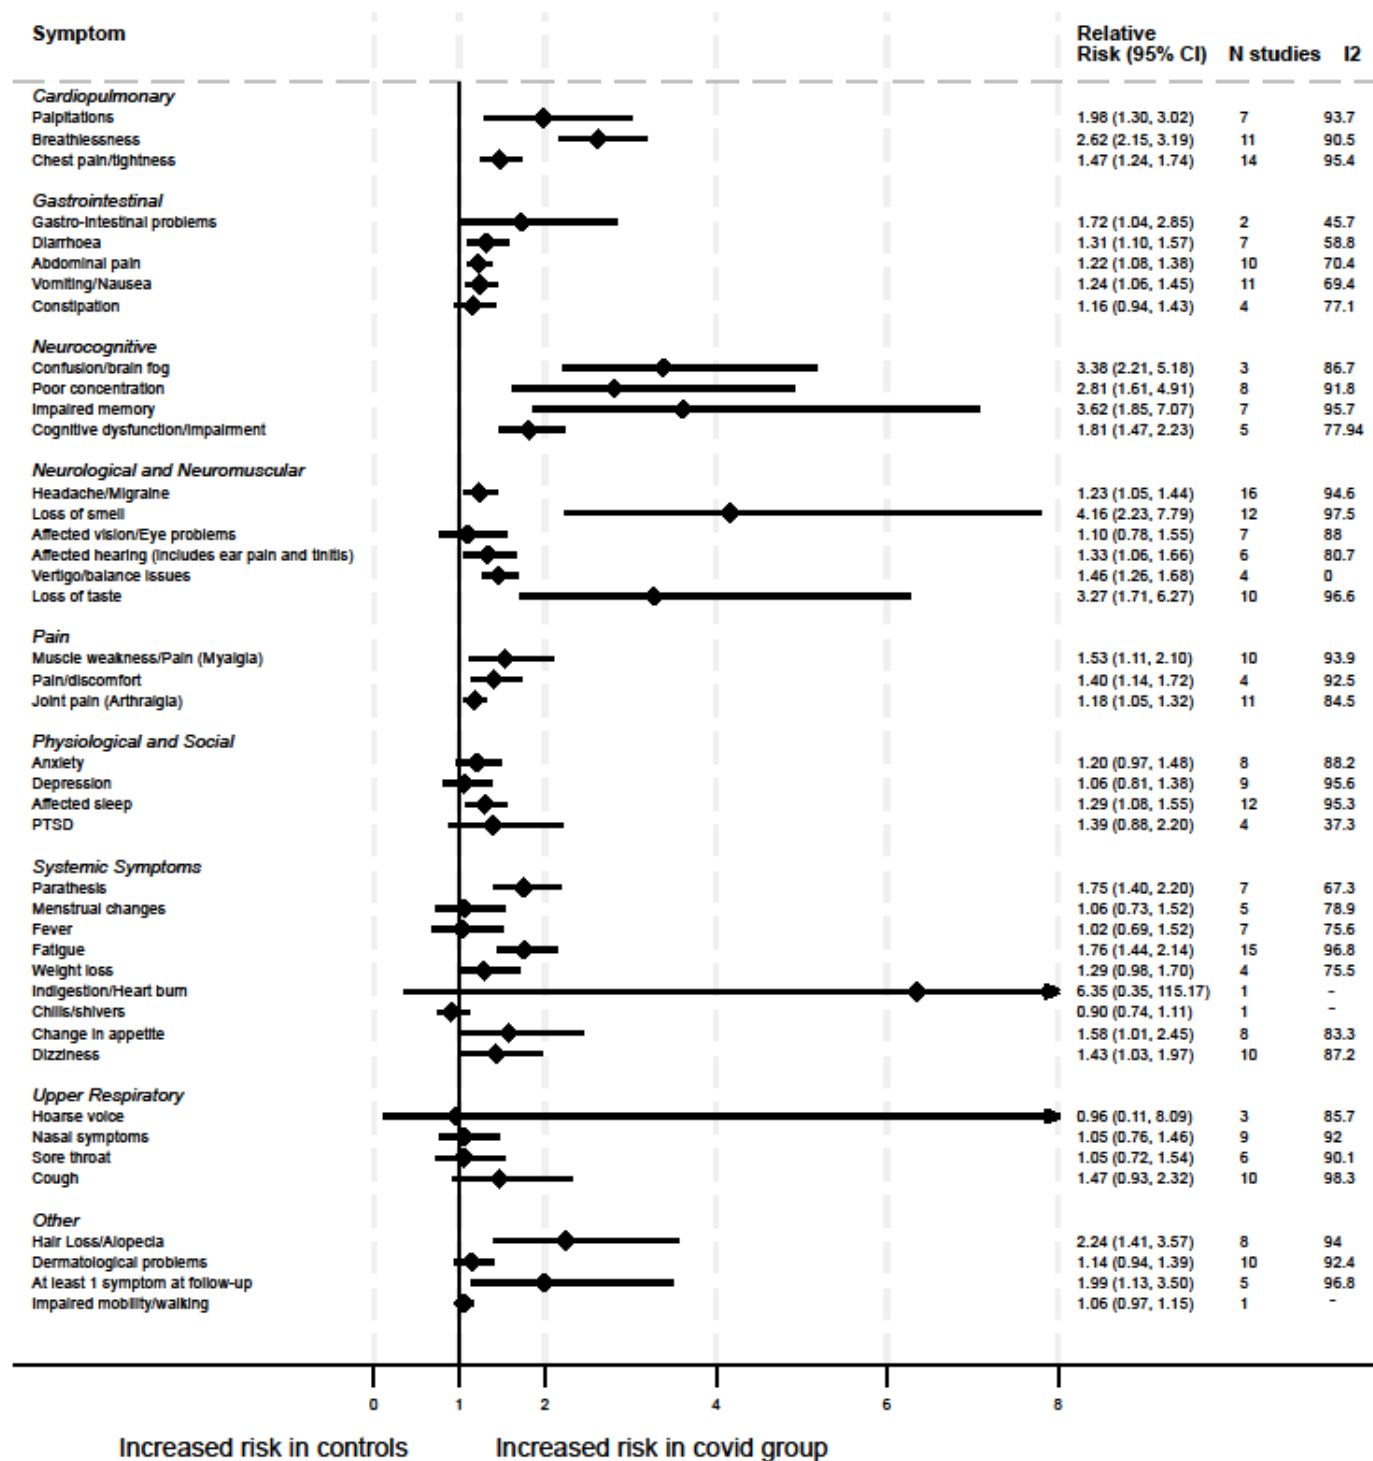

Illustrates pooled relative risks and associated 95% confidence intervals for each symptom using random effects models. All tests were 2-sided and no adjustment was made for multiple comparisons. Heterogeneity was assessed using Higgins I<sup>2</sup> statistic (I<sup>2</sup> between 75% - 100% indicates considerable between study heterogeneity).

## References for Included Studies

1. Adler, L., *et al.* Long-COVID in patients with a history of mild or asymptomatic SARS-CoV-2 infection: a Nationwide Cohort Study. *Scandinavian Journal of Primary Health Care* **40**, 342-349 (2022).
2. Ahn, B., Choi, S.H. & Yun, K.W. Non-neuropsychiatric Long COVID Symptoms in Children Visiting a Pediatric Infectious Disease Clinic After an Omicron Surge. *Pediatr Infect Dis J* **42**, e143-e145 (2023).
3. Albtoosh, A.S., *et al.* New symptoms and prevalence of postacute COVID-19 syndrome among nonhospitalized COVID-19 survivors. *Scientific reports* **12**, 16921 (2022).
4. Ali, M., Bonna, A.S., Sarkar, A.S. & Islam, A. Is Coronavirus Infection Associated With Musculoskeletal Health Complaints? Results From a Comprehensive Case-Control Study. *J Prim Care Community Health* **13**, 21501319221114259 (2022).
5. Askarian, M., *et al.* Epidemiological and clinical characteristics of long COVID-19 among Iranians: A community-based study in southern Iran. *BMC Public Health* **24**, 2007 (2024).
6. Barboza-Solis, C., *et al.* COVID-19 and long-term impact on symptoms and Health-Related Quality of Life in Costa Rica: the RESPIRA cohort study. *BMC Infectious Diseases* **24**, 557 (2024).
7. Bergia, M., *et al.* Comparative study shows that 1 in 7 Spanish children with COVID-19 symptoms were still experiencing issues after 12 weeks. *Acta paediatrica (Oslo, Norway : 1992)* **111**, 1573-1582 (2022).
8. Binswanger, I.A., *et al.* Assessing the association between antibody status and symptoms of long COVID: A multisite study. *PLoS One* **19**, e0304262 (2024).
9. Blomberg, B., *et al.* Long COVID in a prospective cohort of home-isolated patients. *Nature Medicine* **27**, 1607-1613 (2021).
10. Boscolo-Rizzo, P., *et al.* High prevalence of long-term olfactory, gustatory, and chemesthesis dysfunction in post-COVID-19 patients: a matched case-control study with one-year follow-up using a comprehensive psychophysical evaluation. *Rhinology* **59**, 517-527 (2021).
11. Cai, J., *et al.* A one-year follow-up study of systematic impact of long COVID symptoms among patients post SARS-CoV-2 omicron variants infection in Shanghai, China. *Emerg Microbes Infect* **12**, 2220578 (2023).
12. de Bruijn, S., *et al.* Lower prevalence of post-Covid-19 Condition following Omicron SARS-CoV-2 infection. *Heliyon* **10**, e28941 (2024).
13. Desgranges, F., *et al.* Post-COVID-19 Syndrome in Outpatients: a Cohort Study. *Journal of general internal medicine* **37**, 1943-1952 (2022).
14. Fjellveit, E.B., *et al.* Symptom Burden and Immune Dynamics 6 to 18 Months Following Mild Severe Acute Respiratory Syndrome Coronavirus 2 Infection (SARS-CoV-2): A Case-control Study. *Clinical Infectious Diseases* **76**, e60-e70 (2023).
15. Funk, A.L., *et al.* Post-COVID-19 Conditions Among Children 90 Days After SARS-CoV-2 Infection. *JAMA Network Open* **5**, e2223253-e2223253 (2022).
16. Golla, R., *et al.* Long-term Gastrointestinal Sequelae Following COVID-19: A Prospective Follow-up Cohort Study. *Clinical gastroenterology and hepatology : the official clinical practice journal of the American Gastroenterological Association* **21**, 789-796.e781 (2023).
17. Hastie, C.E., *et al.* True prevalence of long-COVID in a nationwide, population cohort study. *Nat Commun* **14**, 7892 (2023).
18. Hernandez-Romieu, A.C., *et al.* Prevalence of Select New Symptoms and Conditions Among Persons Aged Younger Than 20 Years and 20 Years or Older at 31 to 150 Days After Testing Positive or Negative for SARS-CoV-2. *JAMA Network Open* **5**, e2147053-e2147053 (2022).
19. Horberg, M.A., *et al.* Post-acute sequelae of SARS-CoV-2 with clinical condition definitions and comparison in a matched cohort. *Nature communications* **13**, 5822 (2022).

20. Hosozawa, M., *et al.* Prevalence and risk factors of post-coronavirus disease 2019 condition among children and adolescents in Japan: A matched case-control study in the general population. *Int J Infect Dis* **143**, 107008 (2024).
21. Huang, L., *et al.* Health outcomes in people 2 years after surviving hospitalisation with COVID-19: a longitudinal cohort study. *The Lancet Respiratory Medicine* **10**, 863-876 (2022).
22. Huynh, D.H.T., *et al.* Clinical Characteristics and Outcomes of Long COVID-19 Hospitalized Children in Vietnam. *Pediatr Infect Dis J* **42**, e366-e368 (2023).
23. Iba, A., *et al.* Prevalence of and Risk Factors for Post-COVID-19 Condition during Omicron BA.5-Dominant Wave, Japan. *Emerg Infect Dis* **30**, 1380-1389 (2024).
24. Khullar, D., *et al.* Racial/Ethnic Disparities in Post-acute Sequelae of SARS-CoV-2 Infection in New York: an EHR-Based Cohort Study from the RECOVER Program. *J Gen Intern Med* **38**, 1127-1136 (2023).
25. Li, J., Nadua, K., Chong, C.Y. & Yung, C.F. Long COVID prevalence, risk factors and impact of vaccination in the paediatric population: A survey study in Singapore. *Ann Acad Med Singap* **52**, 522-532 (2023).
26. Marasco, G., *et al.* Prevalence of Gastrointestinal Symptoms in Severe Acute Respiratory Syndrome Coronavirus 2 Infection: results of the Prospective Controlled Multinational GI-COVID-19 Study. *American journal of gastroenterology* **117**, 147-157 (2022).
27. Nehme, M., *et al.* One-year persistent symptoms and functional impairment in SARS-CoV-2 positive and negative individuals. *Journal of internal medicine* **292**, 103-115 (2022).
28. Newlands, F., *et al.* A Cross-Sectional Study of the Health of Emerging Young Adults in England Following a COVID-19 Infection. *J Adolesc Health* **73**, 20-28 (2023).
29. Noviello, D., *et al.* Functional gastrointestinal and somatoform symptoms five months after SARS-CoV-2 infection: A controlled cohort study. *Neurogastroenterology and motility : the official journal of the European Gastrointestinal Motility Society* **34**, e14187 (2022).
30. Nugawela, M.D., *et al.* Predictive model for long COVID in children 3 months after a SARS-CoV-2 PCR test. *BMC medicine* **20**, 465 (2022).
31. Pagen, D.M.E., *et al.* Prevalence of Long-term Symptoms Varies When Using Different Post-COVID-19 Definitions in Positively and Negatively Tested Adults: The PRIME Post-COVID Study. *Open Forum Infect Dis* **10**, ofad471 (2023).
32. Park, H.Y., Song, I.A. & Oh, T.K. Insomnia Disorder Among Coronavirus Disease Survivors: A South Korean Nationwide Cohort Study. *Psychiatry Investig* **18**, 1082-1090 (2021).
33. Pihlaja, R.E., *et al.* Associations of subjective and objective cognitive functioning after COVID-19: A six-month follow-up of ICU, ward, and home-isolated patients. *Brain, Behavior, and Immunity - Health* **27**(2023).
34. Pinto Pereira, S.M., *et al.* Symptom Profiles of Children and Young People 12 Months after SARS-CoV-2 Testing: A National Matched Cohort Study (The CLoCk Study). *Children (Basel)* **10**(2023).
35. Radtke, T., Ulyte, A., Puhan, M.A. & Kriemler, S. Long-term Symptoms After SARS-CoV-2 Infection in Children and Adolescents. *JAMA* **326**, 869-871 (2021).
36. Rao, S., *et al.* Clinical Features and Burden of Postacute Sequelae of SARS-CoV-2 Infection in Children and Adolescents. *JAMA Pediatrics* **176**, 1000-1009 (2022).
37. Rivera-Izquierdo, M., *et al.* Long COVID 12 months after discharge: persistent symptoms in patients hospitalised due to COVID-19 and patients hospitalised due to other causes-a multicentre cohort study. *BMC medicine* **20**, 92 (2022).
38. Roge, I., *et al.* Comparison of Persistent Symptoms After COVID-19 and Other Non-SARS-CoV-2 Infections in Children. *Front Pediatr* **9**, 752385 (2021).

39. Seery, V., *et al.* Persistent symptoms after COVID-19 in children and adolescents from Argentina. *Int J Infect Dis* **129**, 49-56 (2023).
40. Shah, A.D., *et al.* Long Covid symptoms and diagnosis in primary care: A cohort study using structured and unstructured data in The Health Improvement Network primary care database. *PLoS One* **18**, e0290583 (2023).
41. Sneller, M.C., *et al.* A Longitudinal Study of COVID-19 Sequelae and Immunity: Baseline Findings. *Annals of Internal Medicine* **175**, 969-979 (2022).
42. Subramanian, A., *et al.* Symptoms and risk factors for long COVID in non-hospitalized adults. *Nature medicine* **28**, 1706-1714 (2022).
43. Thors, V., Bjornsdottir, K.L., Love, T.J. & Haraldsson, A. Long COVID in Icelandic Children: A Matched Cohort Study of Nonspecific Symptoms Following SARS-CoV-2 Infection. *Pediatr Infect Dis J* **43**, 226-233 (2024).
44. Tisler, A., *et al.* Post-acute sequelae of COVID-19 among hospitalized patients in Estonia: Nationwide matched cohort study. *PloS one* **17**, e0278057 (2022).
45. van der Maaden, T., *et al.* Prevalence and Severity of Symptoms 3 Months After Infection With SARS-CoV-2 Compared to Test-Negative and Population Controls in the Netherlands. *J Infect Dis* **227**, 1059-1067 (2023).
46. Van Herck, M., *et al.* Impact of post-COVID-19 condition on health status and activities of daily living: the PRIME post-COVID study. *Thorax* **79**, 457-464 (2024).
47. Xiong, Q., *et al.* Clinical sequelae of COVID-19 survivors in Wuhan, China: a single-centre longitudinal study. *Clin Microbiol Infect* **27**, 89-95 (2021).
48. Xu, E., Xie, Y. & Al-Aly, Z. Long-term neurologic outcomes of COVID-19. *Nature medicine* **28**, 2406-2415 (2022).
49. Zhang, Y., *et al.* Association between SARS-CoV-2 infection and select symptoms and conditions 31 to 150 days after testing among children and adults. *BMC Infectious Diseases* **24**, 181 (2024).
50. Zhao, S., *et al.* Long COVID is associated with severe cognitive slowing: a multicentre cross-sectional study. *eClinicalMedicine* **68**(2024).
